# Supplementary material for: El Niño enhances snow-line rise and ice loss on the Quelccaya Ice Cap, Peru
Source: Copernicus journal article supplement (doi:10.5194/tc-18-4633-2024), 2024-10-08
Supplement: Supplementary file 1 [file tc-18-4633-2024-supplement.pdf]

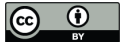

*Supplement of*

## **El Niño enhances snow-line rise and ice loss on the Quelccaya Ice Cap, Peru**

**Kara A. Lamantia et al.**

*Correspondence to:* Kara A. Lamantia (lamantia.31@osu.edu)

The copyright of individual parts of the supplement might differ from the article licence.

## **Contents**

### ***Tables***

**Table S1:** Detailed satellite image and DEM usage information

**Table S2:** Annual QIC variables

**Table S3:** Linear regression analysis results with and without El Niño events

**Table S4:** Analysis of variance (ANOVA) with post hoc testing between El Niño, La Niña, and neutral events

**Table S5:** Zero-order correlations between QIC variables and ENSO indices

### ***Figures***

**Figure S1:** Method flowchart for imagery analysis

**Figure S2:** Example NIR histogram with Otsu threshold

**Figure S3:** Example ELA Calculation

**Figure S4:** Box-and-whisker plots summarizing QIC variable distributions during El Niño, La Niña, and neutral years

**Figure S5:** Projected decline of QIC total area and snow cover area

| Satellite  | Date       | Image Information                                                  | Cloud Cover % | DEM Used           |
|------------|------------|--------------------------------------------------------------------|---------------|--------------------|
| Landsat 5  | 7/25/1985  | LANDSAT/LT05/C02/T1_TOA/LT05_003070_19850725                       | 2             | NASA SRTM DEM      |
| Landsat 5  | 7/12/1986  | LANDSAT/LT05/C02/T1_TOA/LT05_003070_19860712                       | 0             |                    |
| Landsat 5  | 9/3/1988   | LANDSAT/LT05/C02/T1_TOA/LT05_003070_19880903                       | 13            |                    |
| Landsat 5  | 9/22/1989  | LANDSAT/LT05/C02/T1_TOA/LT05_003070_19890922                       | 5             |                    |
| Landsat 5  | 8/8/1990   | LANDSAT/LT05/C02/T1_TOA/LT05_003070_19900808                       | 7             |                    |
| Landsat 5  | 8/27/1991  | LANDSAT/LT05/C02/T1_TOA/LT05_003070_19910827                       | 1             |                    |
| Landsat 5  | 9/14/1992  | LANDSAT/LT05/C02/T1_TOA/LT05_003070_19920914                       | 4             |                    |
| Landsat 5  | 8/19/1994  | LANDSAT/LT05/C02/T1_TOA/LT05_003070_19940819                       | 11            |                    |
| Landsat 5  | 9/7/1995   | LANDSAT/LT05/C02/T1_TOA/LT05_003070_19950907                       | 1             |                    |
| Landsat 5  | 9/9/1996   | LANDSAT/LT05/C02/T1_TOA/LT05_003070_19960909                       | 6             |                    |
| Landsat 5  | 8/27/1997  | LANDSAT/LT05/C02/T1_TOA/LT05_003070_19970827                       | 9             |                    |
| Landsat 5  | 9/15/1998  | LANDSAT/LT05/C02/T1_TOA/LT05_003070_19980915                       | 8             |                    |
| Landsat 5  | 11/21/1999 | LANDSAT/LT05/C02/T1_TOA/LT05_003070_19991121                       | 3             |                    |
| Landsat 5  | 8/3/2000   | LANDSAT/LT05/C02/T1_TOA/LT05_003070_20000803                       | 12            |                    |
| Landsat 7  | 8/14/2001  | LANDSAT/LE07/C02/T1_TOA/LE07_003070_20010814                       | 1             |                    |
| Landsat 7  | 10/20/2002 | LANDSAT/LE07/C02/T1_TOA/LE07_003070_20021020                       | 3             |                    |
| Landsat 5  | 9/29/2003  | LANDSAT/LT05/C02/T1_TOA/LT05_003070_20030929                       | 11            |                    |
| Landsat 5  | 11/5/2005  | LANDSAT/LT05/C02/T1_TOA/LT05_003070_20051105                       | 1             |                    |
| Landsat 5  | 9/5/2006   | LANDSAT/LT05/C02/T1_TOA/LT05_003070_20060905                       | 4             | Copernicus DEM 30m |
| Landsat 5  | 8/23/2007  | LANDSAT/LT05/C02/T1_TOA/LT05_003070_20070823                       | 1             |                    |
| Landsat 5  | 8/25/2008  | LANDSAT/LT05/C02/T1_TOA/LT05_003070_20080825                       | 0             |                    |
| Landsat 5  | 10/31/2009 | LANDSAT/LT05/C02/T1_TOA/LT05_003070_20091031                       | 2             |                    |
| Landsat 5  | 9/16/2010  | LANDSAT/LT05/C02/T1_TOA/LT05_003070_20100916                       | 0             |                    |
| Landsat 5  | 9/3/2011   | LANDSAT/LT05/C02/T1_TOA/LT05_003070_20110903                       | 1             |                    |
| Landsat 8  | 9/8/2013   | LANDSAT/LC08/C01/T1_SR/LC08_003070_20130908                        | 6.5           |                    |
| Landsat 8  | 10/13/2014 | LANDSAT/LC08/C01/T1_SR/LC08_003070_20141013                        | 11.0          |                    |
| Landsat 8  | 9/14/2015  | LANDSAT/LC08/C01/T1_SR/LC08_003070_20150914                        | 9.1           |                    |
| Landsat 8  | 9/16/2016  | LANDSAT/LC08/C01/T1_SR/LC08_003070_20160916                        | 23.0          |                    |
| Landsat 8  | 10/5/2017  | LANDSAT/LC08/C01/T1_SR/LC08_003070_20171005                        | 2.2           |                    |
| Landsat 8  | 9/25/2019  | LANDSAT/LC08/C01/T1_SR/LC08_003070_20190925                        | 7.6           |                    |
| Landsat 8  | 8/26/2020  | LANDSAT/LC08/C01/T1_SR/LC08_003070_20200826                        | 3.7           |                    |
| Sentinel-2 | 10/21/2021 | COPERNICUS/S2_SR_HARMONIZED/20211021T145731_20211021T150154_T19LBE | 6.0           |                    |
| Landsat 9  | 10/11/2022 | LANDSAT/LC09/C02/T1_TOA/LC09_003070_20221011                       | 1.4           |                    |
| Sentinel-2 | 10/11/2023 | COPERNICUS/S2_SR_HARMONIZED/20231011T145729_20231011T150056_T19LBE | 3.1           |                    |

Table S1: Imagery Collection Details and DEM usage information.

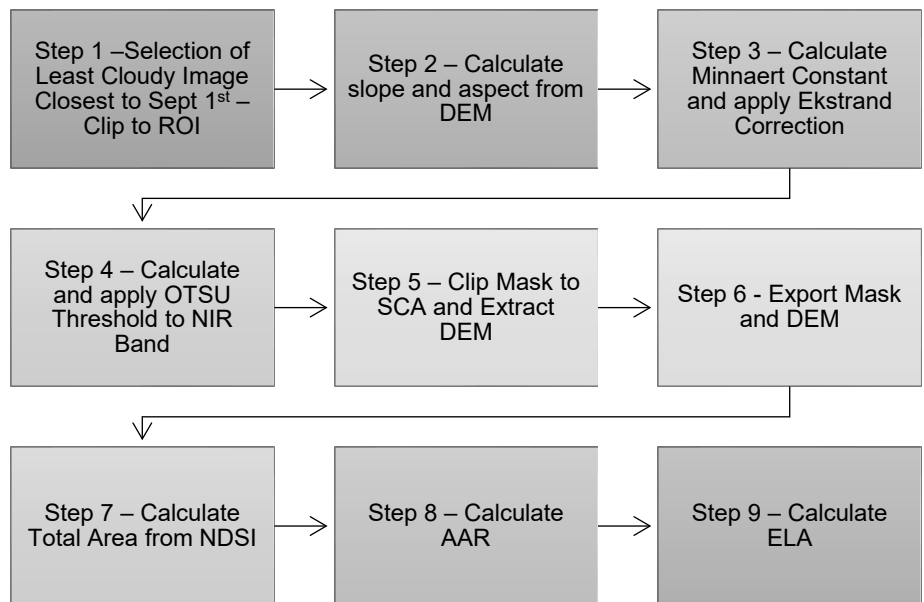

Figure S1: Flowchart depicting pre-processing and processing steps to calculate and export select variables from the end of the dry season on the QIC.

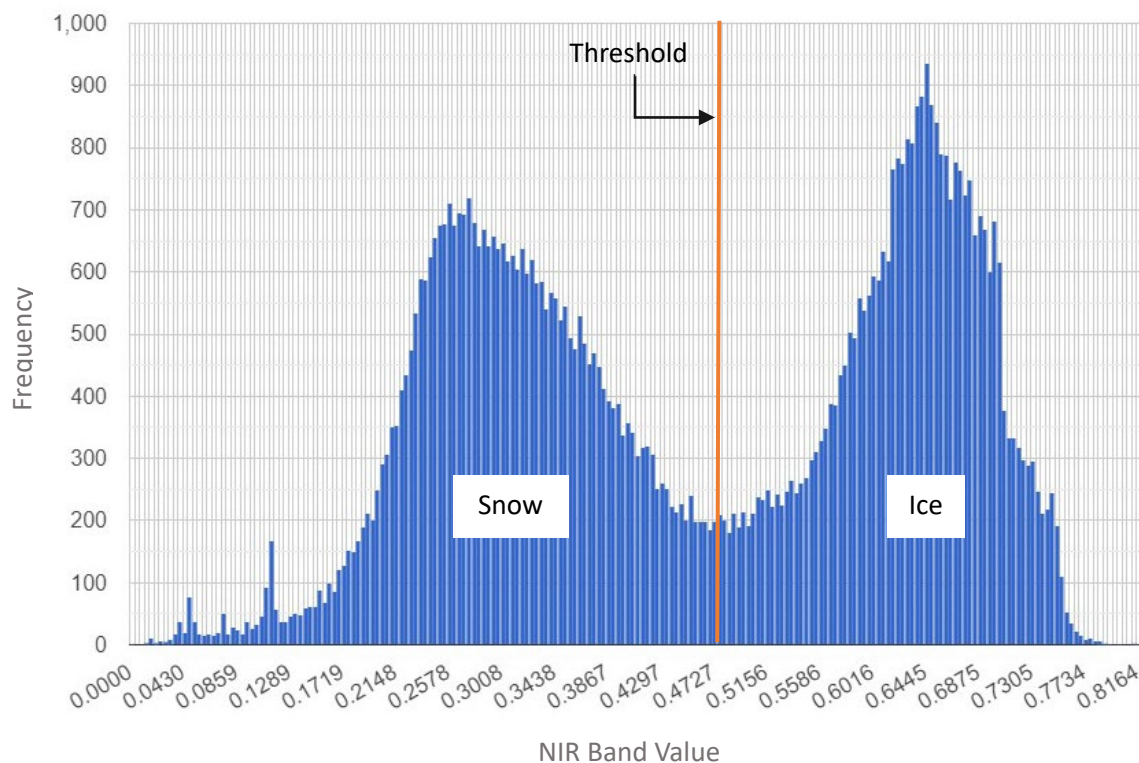

Figure S2: Example of a NIR band histogram from 2015. The bimodal distribution of snow and ice reflectance is shown. The Otsu method is applied to calculate the threshold (orange line; 0.478).

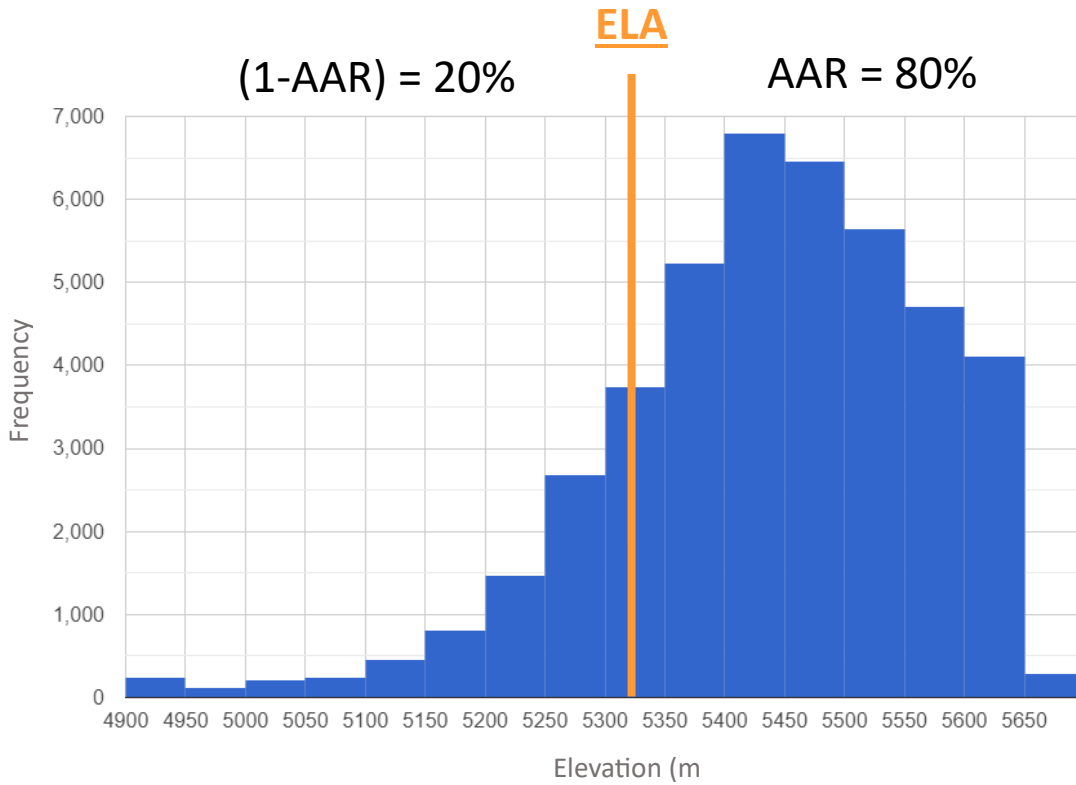

Figure S3: Example ELA calculation (with an AAR of 0.80 or 80%) using the elevation distribution of the total area. The 1-AAR value is used to find the ELA (i.e., in this case the ELA is assumed to be located at the 20<sup>th</sup> percentile of elevations in the total area).

| Imagery Date | TA (km <sup>2</sup> ) | SCA (km <sup>2</sup> ) | AAR  | Med Elev (m a.s.l.) | ELA (m a.s.l.) |
|--------------|-----------------------|------------------------|------|---------------------|----------------|
| 7/25/1985    | 58.67                 | 46.35                  | 0.79 | 5421                | 5249           |
| 7/12/1986    | 58.06                 | 45.93                  | 0.79 | 5426                | 5249           |
| 9/3/1988     | 55.96                 | 37.25                  | 0.67 | 5457                | 5341           |
| 9/22/1989    | 55.34                 | 43.66                  | 0.79 | 5437                | 5266           |
| 8/8/1990     | 53.52                 | 37.53                  | 0.70 | 5457                | 5317           |
| 8/27/1991    | 51.22                 | 34.49                  | 0.67 | 5470                | 5341           |
| 9/14/1992    | 51.65                 | 35.09                  | 0.68 | 5465                | 5337           |
| 8/19/1994    | 52.24                 | 39.68                  | 0.76 | 5450                | 5298           |
| 9/7/1995     | 50.65                 | 31.94                  | 0.63 | 5481                | 5365           |
| 9/9/1996     | 50.89                 | 35.73                  | 0.70 | 5465                | 5333           |
| 8/27/1997    | 50.89                 | 36.70                  | 0.72 | 5462                | 5322           |
| 9/15/1998    | 47.65                 | 15.11                  | 0.32 | 5546                | 5493           |
| 11/21/1999   | 47.46                 | 39.30                  | 0.83 | 5453                | 5285           |
| 8/3/2000     | 48.31                 | 36.40                  | 0.75 | 5462                | 5322           |
| 8/14/2001    | 48.76                 | 39.51                  | 0.81 | 5450                | 5293           |
| 10/20/2002   | 47.00                 | 42.22                  | 0.90 | 5441                | 5241           |
| 9/29/2003    | 47.97                 | 36.45                  | 0.76 | 5462                | 5322           |
| 11/5/2005    | 45.60                 | 36.59                  | 0.80 | 5462                | 5310           |
| 9/5/2006     | 45.55                 | 30.86                  | 0.68 | 5486                | 5370           |
| 8/23/2007    | 44.94                 | 31.15                  | 0.69 | 5482                | 5370           |
| 8/25/2008    | 45.02                 | 31.82                  | 0.71 | 5458                | 5362           |
| 10/31/2009   | 43.50                 | 29.03                  | 0.67 | 5494                | 5386           |
| 9/16/2010    | 44.39                 | 24.50                  | 0.55 | 5514                | 5422           |
| 9/3/2011     | 44.93                 | 37.01                  | 0.82 | 5458                | 5306           |
| 9/8/2013     | 44.93                 | 35.78                  | 0.80 | 5466                | 5318           |
| 10/13/2014   | 44.86                 | 35.07                  | 0.78 | 5470                | 5346           |
| 9/14/2015    | 43.93                 | 32.38                  | 0.74 | 5478                | 5358           |
| 9/16/2016    | 41.26                 | 16.41                  | 0.40 | 5550                | 5486           |
| 10/5/2017    | 41.54                 | 24.90                  | 0.60 | 5510                | 5422           |
| 9/25/2019    | 42.92                 | 31.51                  | 0.73 | 5474                | 5366           |
| 8/26/2020    | 39.79                 | 29.10                  | 0.73 | 5494                | 5386           |
| 10/21/2021   | 37.85                 | 26.00                  | 0.69 | 5502                | 5410           |
| 10/31/2022   | 36.71                 | 19.66                  | 0.54 | 5534                | 5458           |
| 10/11/2023   | 34.09                 | 17.97                  | 0.53 | 5542                | 5474           |

Table S2: Annual QIC variables calculated for the end of the dry season: total area (TA), snow-covered area (SCA), accumulation-area ratio (AAR), median elevation of the SCA (Med Elev), and the equilibrium-line altitude (ELA).

|                            | SCA    | SCA<br>(no El Niño) | ELA       | ELA<br>(no El Niño) | TA      | TA<br>(no El Niño) |
|----------------------------|--------|---------------------|-----------|---------------------|---------|--------------------|
| <b>R-squared</b>           | 0.44   | 0.58                | 0.40      | 0.47                | 0.93    | 0.93               |
| <b>Intercept</b>           | 950.93 | 868.19              | -21890.06 | -1167.41            | 1030.38 | 999.12             |
| <b>Coefficient (slope)</b> | -0.47  | -0.42               | 3.61      | 3.25                | -0.49   | -0.47              |
| <b>Standard Error</b>      | 0.09   | 0.07                | 0.79      | 0.64                | 0.02    | 0.02               |
| <b>p-value</b>             | <0.001 | <0.001              | <0.001    | <0.001              | <0.001  | <0.001             |

Table S3: Results of linear regression analysis for SCA, ELA and TA, with and without El Niño years (1998 & 2016).

|                   | Group 1 | Group 2 | Mean Difference | p-value             | Reject      |
|-------------------|---------|---------|-----------------|---------------------|-------------|
| <b>SCA</b>        | El Niño | La Niña | 6.850           | 0.154               | FALSE       |
|                   | El Niño | Neutral | 8.793           | <b><i>0.019</i></b> | <b>TRUE</b> |
|                   | La Niña | Neutral | 1.943           | 0.801               | FALSE       |
| <b>ELA</b>        | El Niño | La Niña | -61.901         | 0.110               | FALSE       |
|                   | El Niño | Neutral | -76.112         | <b><i>0.013</i></b> | <b>TRUE</b> |
|                   | La Niña | Neutral | -14.215         | 0.841               | FALSE       |
| <b>AAR</b>        | El Niño | La Niña | 0.161           | <b><i>0.007</i></b> | <b>TRUE</b> |
|                   | El Niño | Neutral | 0.178           | <b><i>0.001</i></b> | <b>TRUE</b> |
|                   | La Niña | Neutral | 0.017           | 0.912               | FALSE       |
| <b>Total Area</b> | El Niño | La Niña | -0.845          | 0.956               | FALSE       |
|                   | El Niño | Neutral | 1.041           | 0.910               | FALSE       |
|                   | La Niña | Neutral | 1.886           | 0.736               | FALSE       |

Table S4: Analysis of variance (ANOVA) with post hoc testing between El Niño, La Niña, and neutral events. Results with significant p-values ( $p < 0.05$ ) are shown in bold italics.

| <u>Preceding Month</u> | <u>MEI</u>    |               |                 | <u>SOI</u>    |               |                 | <u>ONI</u>   |               |                 |
|------------------------|---------------|---------------|-----------------|---------------|---------------|-----------------|--------------|---------------|-----------------|
|                        | <i>ELA</i>    | <i>SCA</i>    | <i>Med Elev</i> | <i>ELA</i>    | <i>SCA</i>    | <i>Med Elev</i> | <i>ELA</i>   | <i>SCA</i>    | <i>Med Elev</i> |
| -                      |               |               |                 |               |               |                 |              |               |                 |
| <b>September</b>       | <i>0.484</i>  | <i>-0.501</i> | <i>-0.500</i>   | <i>-0.426</i> | <i>0.418</i>  | <i>-0.388</i>   | <i>0.577</i> | <i>-0.598</i> | <i>0.608</i>    |
| <b>October</b>         | <i>0.443</i>  | <i>-0.451</i> | <i>0.455</i>    | -0.420        | <i>0.416</i>  | <i>-0.410</i>   | <i>0.543</i> | <i>-0.564</i> | <i>0.571</i>    |
| <b>November</b>        | <i>0.456</i>  | <i>-0.463</i> | <i>0.467</i>    | <i>-0.502</i> | <i>0.487</i>  | <i>-0.485</i>   | <i>0.541</i> | <i>-0.561</i> | <i>0.571</i>    |
| <b>December</b>        | <i>0.470</i>  | <i>-0.495</i> | <i>0.503</i>    | <i>-0.276</i> | <i>0.289</i>  | <i>-0.306</i>   | <i>0.550</i> | <i>-0.570</i> | <i>0.581</i>    |
| <b>January</b>         | <i>0.528</i>  | <i>-0.557</i> | <i>0.560</i>    | <i>-0.572</i> | <i>0.588</i>  | <i>-0.591</i>   | <i>0.550</i> | <i>-0.572</i> | <i>0.586</i>    |
| <b>February</b>        | <i>0.583</i>  | <i>-0.611</i> | <i>0.619</i>    | <i>-0.388</i> | <i>0.397</i>  | <i>-0.438</i>   | <i>0.541</i> | <i>-0.566</i> | <i>0.585</i>    |
| <b>March</b>           | <i>0.524</i>  | <i>-0.550</i> | <i>0.570</i>    | <i>-0.382</i> | <i>0.404</i>  | <i>-0.413</i>   | <i>0.501</i> | <i>-0.525</i> | <i>0.550</i>    |
| <b>April</b>           | <i>0.558</i>  | <i>-0.577</i> | <i>0.583</i>    | <i>-0.418</i> | <i>0.432</i>  | <i>-0.419</i>   | <i>0.411</i> | <i>-0.435</i> | <i>0.460</i>    |
| <b>May</b>             | <i>0.446</i>  | <i>-0.462</i> | <i>0.462</i>    | 0.162         | -0.147        | 0.156           | 0.233        | -0.251        | 0.279           |
| <b>June</b>            | 0.030         | -0.023        | 0.030           | 0.296         | -0.314        | 0.308           | -0.039       | 0.028         | -0.002          |
| <b>July</b>            | -0.251        | 0.267         | -0.251          | 0.332         | -0.332        | -0.332          | -0.186       | 0.190         | -0.168          |
| <b>August</b>          | <i>-0.341</i> | <i>0.348</i>  | -0.319          | <i>0.404</i>  | <i>-0.387</i> | <i>0.336</i>    | -0.262       | 0.266         | -0.250          |

Table S5: Zero-order correlations ( $r$ ) between QIC variables (including the equilibrium-line altitude (ELA), snow cover area (SCA), and median elevation of the SCA (Med Elev)) and ENSO indices (including the Multivariate ENSO Index (MEI), the Ocean Niño Index (ONI), and the Southern Oscillation Index (SOI)). Statistically significant values ( $p < 0.05$ ) are marked in italics and underlined.



a)

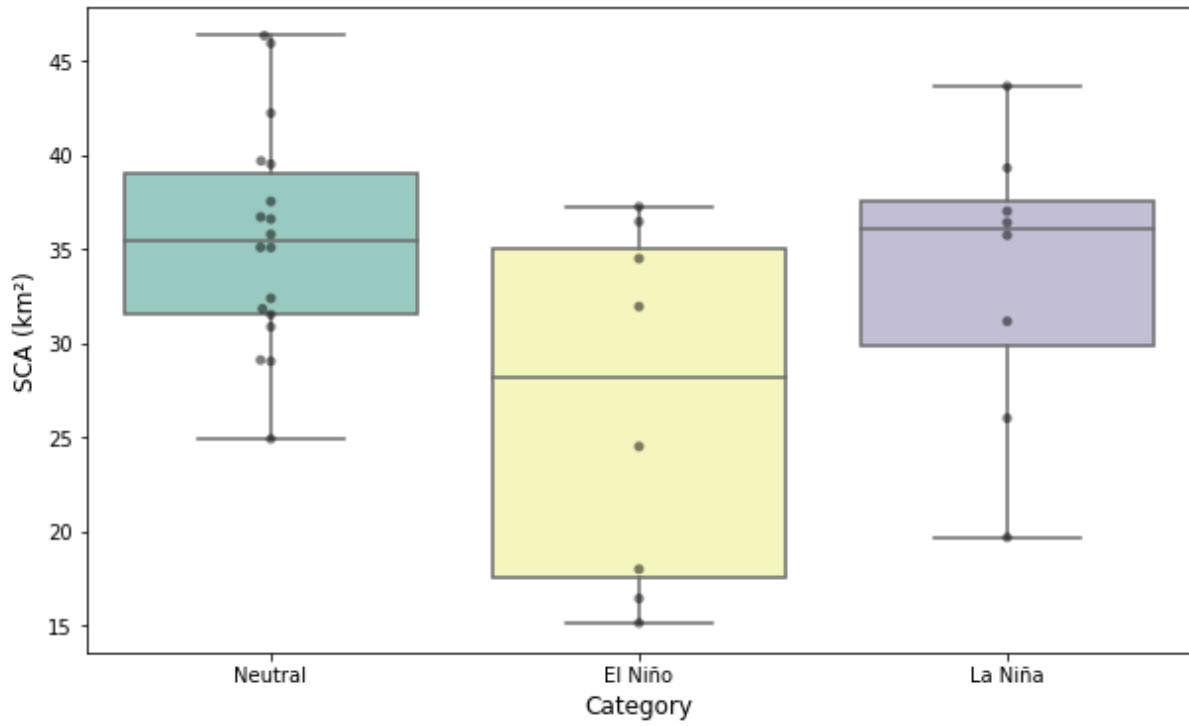

b)

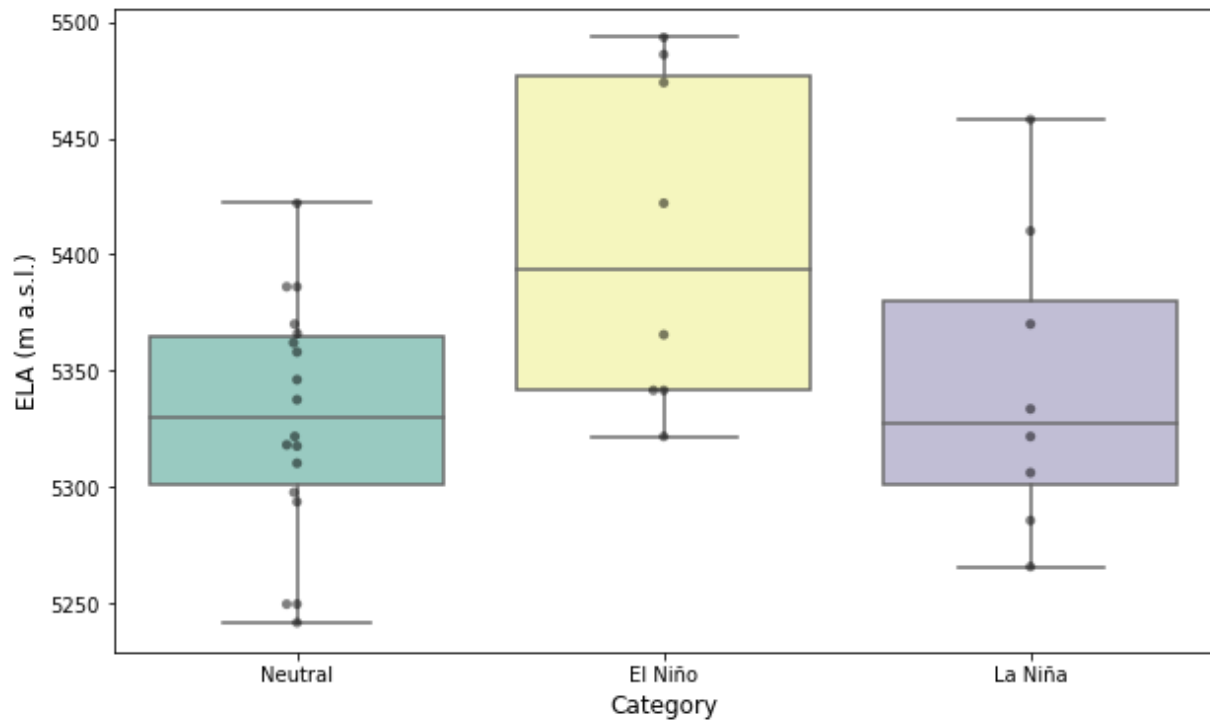

c)

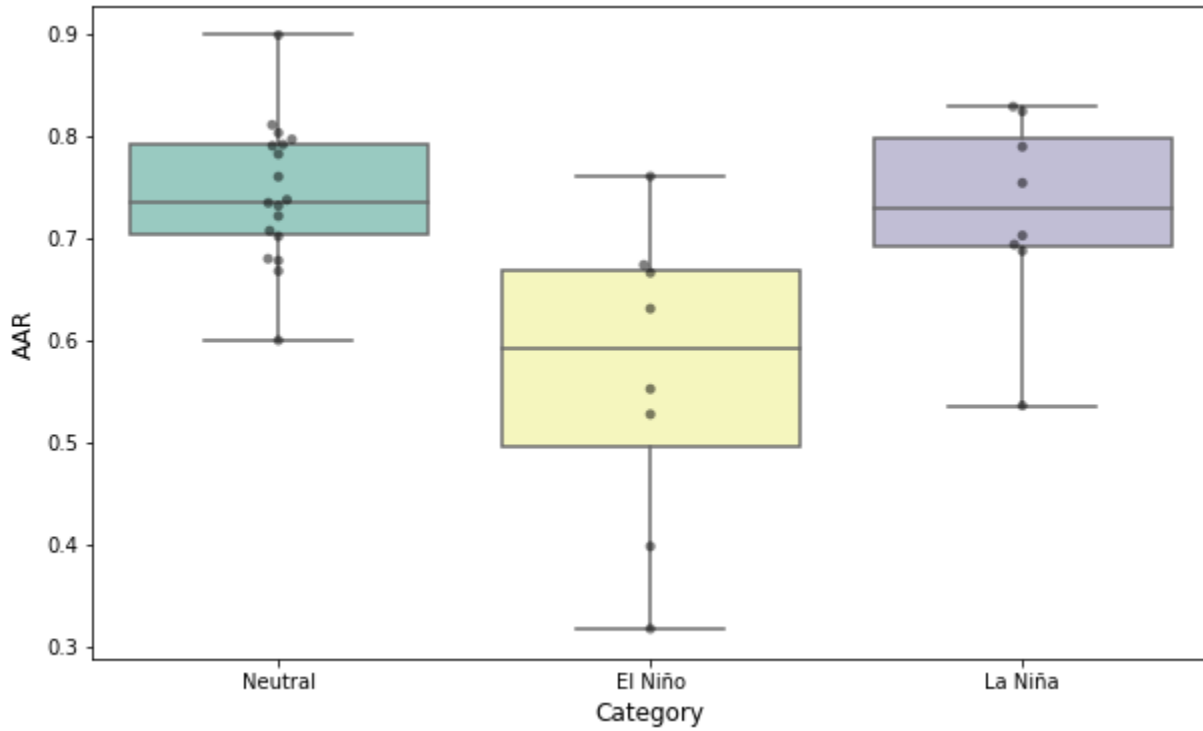

d)

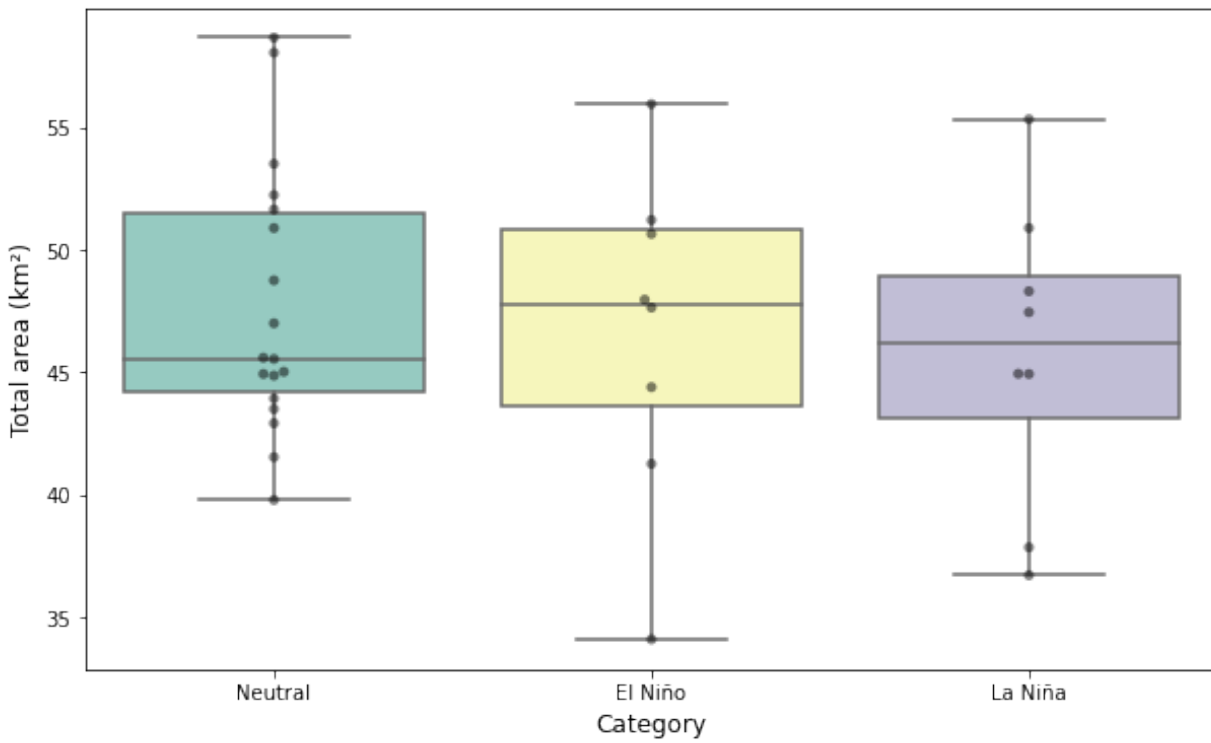

Figure S4: Box-and-whisker plots summarizing distributions in a) SCA, b) ELA, c) AAR, and d) TA during El Niño (yellow), La Niña (purple), and neutral (green) years.

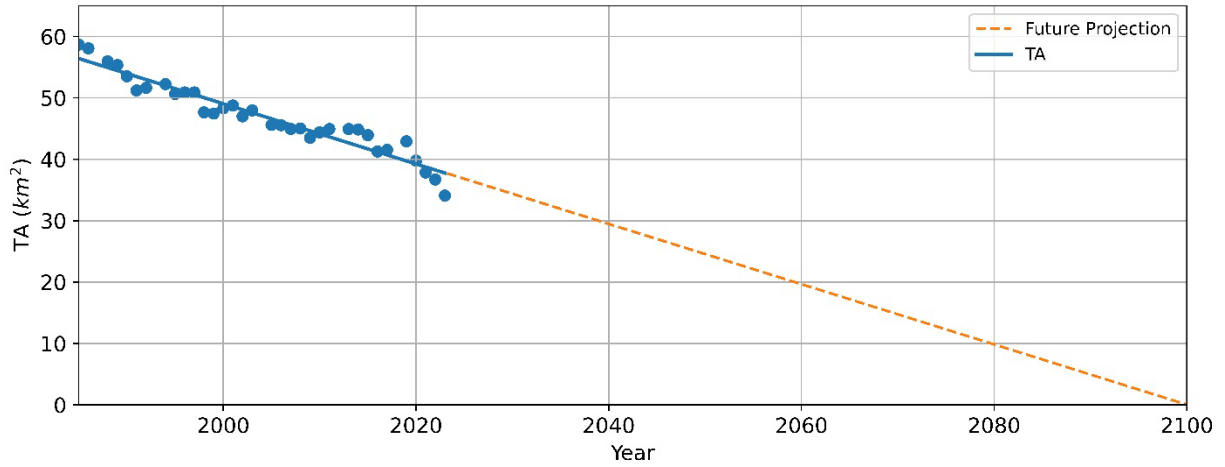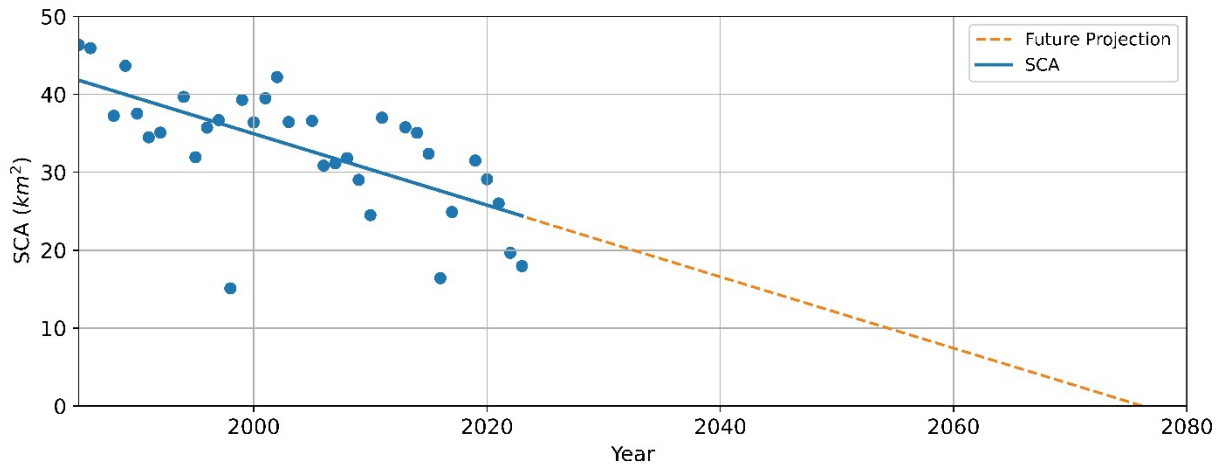

Figure S5: Projected decline in the TA (top) and SCA (bottom) of the QIC, assuming a linear decline based on the last 40 years of data.
